# Supplementary material for: Semantic Self-Images and Well-Being in Young and Older Adults: Does the Accessibility Matter?
Source: MDPI journal article supplement (doi:10.3390/brainsci12060716), 2022-05-31
Supplement: s1 [file s1]

## SUPPLEMENTARY MATERIALS

### Emotional Valence

Table S1. Results of the multinomial regression for the emotional valence of the first statement

| Predictor                    | Estimate    | SE          | z-statistic | P           | r                     |
|------------------------------|-------------|-------------|-------------|-------------|-----------------------|
| <i>Negative as reference</i> |             |             |             |             |                       |
| <i>Neutral vs Negative</i>   |             |             |             |             |                       |
| (Intercept)                  | 1.27        | 1.34        | 0.95        | .341        | .11 [-.12, .33]       |
| Group(Young)                 | 0.77        | 1.93        | 0.40        | .688        | .05 [-.18, .27]       |
| PSS                          | -3.30       | 2.06        | -1.60       | .109        | -.18 [-.40, .04]      |
| PANAS-NEG                    | 3.00        | 2.22        | 1.35        | .177        | .15 [-.07, .37]       |
| PANAS-POS                    | -1.68       | 1.70        | -0.99       | .324        | -.11 [-.34, .11]      |
| SWLS                         | 2.14        | 1.70        | 1.26        | .206        | .14 [-.08, .37]       |
| Group(Young):PSS             | 1.93        | 2.99        | 0.65        | .519        | .07 [-.15, .30]       |
| Group(Young):PANAS-NEG       | -2.17       | 2.55        | -0.85       | .395        | -.10 [-.32, .13]      |
| Group(Young):PANAS-POS       | 2.54        | 2.10        | 1.21        | .225        | .14 [-.08, .36]       |
| Group(Young):SWLS            | -1.00       | 2.15        | -0.47       | .642        | -.05 [-.28, .17]      |
| <i>Positive vs Negative</i>  |             |             |             |             |                       |
| (Intercept)                  | 2.66        | 1.19        | 2.24        | .025        | .25 [.04, .46]        |
| Group(Young)                 | -0.47       | 1.84        | -0.26       | .797        | -.03 [-.26, .20]      |
| PSS                          | -3.01       | 2.01        | -1.50       | .134        | -.17 [-.39, .05]      |
| PANAS-NEG                    | 4.42        | 2.28        | 1.94        | .053        | .22 [.00, .43]        |
| PANAS-POS                    | -0.82       | 1.69        | -0.48       | .629        | -.06 [-.28, .17]      |
| <b>SWLS</b>                  | <b>3.68</b> | <b>1.86</b> | <b>1.98</b> | <b>.048</b> | <b>.22 [.01, .44]</b> |
| Group(Young):PSS             | 1.06        | 2.98        | 0.36        | .721        | .04 [-.19, .27]       |
| Group(Young):PANAS-NEG       | -4.49       | 2.65        | -1.70       | .090        | -.19 [-.41, .03]      |
| Group(Young):PANAS-POS       | 2.49        | 2.10        | 1.19        | .235        | .13 [-.09, .36]       |
| Group(Young):SWLS            | -2.41       | 2.33        | -1.03       | .302        | -.12 [-.34, .11]      |
| <i>Neutral as reference</i>  |             |             |             |             |                       |
| <i>Positive vs Neutral</i>   |             |             |             |             |                       |
| (Intercept)                  | 1.39        | 0.82        | 1.70        | .089        | .19 [-.03, .41]       |
| Group(Young)                 | -1.25       | 1.03        | -1.21       | .226        | -.14 [-.36, .08]      |
| PSS                          | 0.29        | 1.25        | 0.23        | .816        | .03 [-.20, .25]       |
| PANAS-NEG                    | 1.42        | 1.30        | 1.09        | .274        | .12 [-.10, .35]       |
| PANAS-POS                    | 0.86        | 0.76        | 1.13        | .257        | .13 [-.09, .35]       |
| SWLS                         | 1.54        | 0.96        | 1.60        | .109        | .18 [-.04, .40]       |
| Group(Young):PSS             | -0.87       | 1.57        | -0.55       | .580        | -.06 [-.29, .16]      |
| Group(Young):PANAS-NEG       | -2.33       | 1.51        | -1.54       | .124        | -.17 [-.39, .05]      |
| Group(Young):PANAS-POS       | -0.06       | 1.00        | -0.06       | .955        | -.01 [-.23, .22]      |
| Group(Young):SWLS            | -1.41       | 1.28        | -1.10       | .272        | -.12 [-.35, .10]      |

Note: significant ( $p < .05$ ) are bolded for ease of interpretation; SE = standard error of the estimate; p = p-value, r = effect size; PSS: Perceived Stress Scale; PANAS-NEG: Positive and Negative Affect Schedule - Negative Affect; PANAS-POS: Positive and Negative Affect Schedule - Positive Affect; SWLS: Satisfaction With Life Scale.

Table S2. Results of the multilevel multinomial regression for the emotional valence of all statements

| Predictor                     | Estimate     | SE          | z-statistic  | p           | r                        |
|-------------------------------|--------------|-------------|--------------|-------------|--------------------------|
| <i>Negative as reference</i>  |              |             |              |             |                          |
| <i>Neutral vs Negative</i>    |              |             |              |             |                          |
| (Intercept)                   | 0.43         | 0.31        | 1.39         | .164        | .16 [-.06, .38]          |
| <b>Group(Young)</b>           | <b>0.87</b>  | <b>0.44</b> | <b>1.98</b>  | <b>.048</b> | <b>.22 [.01, .44]</b>    |
| PSS                           | -0.40        | 0.47        | -0.86        | .392        | -.10 [-.32, .13]         |
| PANAS-NEG                     | 0.40         | 0.51        | 0.79         | .433        | .09 [-.13, .31]          |
| <b>PANAS-POS</b>              | <b>-1.09</b> | <b>0.40</b> | <b>-2.73</b> | <b>.006</b> | <b>-.30 [-.51, -.09]</b> |
| <b>SWLS</b>                   | <b>0.91</b>  | <b>0.33</b> | <b>2.74</b>  | <b>.006</b> | <b>.30 [.09, .51]</b>    |
| Group(Young):PSS              | 0.06         | 0.77        | 0.07         | .942        | .01 [-.22, .23]          |
| Group(Young):PANAS-NEG        | -0.80        | 0.64        | -1.26        | .207        | -.14 [-.36, .08]         |
| <b>Group(Young):PANAS-POS</b> | <b>1.75</b>  | <b>0.55</b> | <b>3.20</b>  | <b>.001</b> | <b>.34 [.15, .54]</b>    |
| Group(Young):SWLS             | -0.66        | 0.52        | -1.27        | .206        | -.14 [-.37, .08]         |
| <i>Positive vs Negative</i>   |              |             |              |             |                          |
| (Intercept)                   | 0.62         | 0.33        | 1.90         | .058        | .21 [.00, .43]           |
| Group(Young)                  | 0.84         | 0.46        | 1.83         | .068        | .21 [-.01, .42]          |
| PSS                           | -0.17        | 0.51        | -0.34        | .733        | -.04 [-.27, .19]         |
| PANAS-NEG                     | -0.16        | 0.54        | -0.29        | .775        | -.03 [-.26, .19]         |
| PANAS-POS                     | -0.56        | 0.43        | -1.30        | .192        | -.15 [-.37, .07]         |
| <b>SWLS</b>                   | <b>0.99</b>  | <b>0.35</b> | <b>2.78</b>  | <b>.005</b> | <b>.30 [.10, .51]</b>    |
| Group(Young):PSS              | -0.42        | 0.80        | -0.53        | .596        | -.06 [-.29, .16]         |
| Group(Young):PANAS-NEG        | -0.49        | 0.68        | -0.73        | .467        | -.08 [-.31, .14]         |
| <b>Group(Young):PANAS-POS</b> | <b>1.28</b>  | <b>0.58</b> | <b>2.21</b>  | <b>.027</b> | <b>.25 [.03, .46]</b>    |
| Group(Young):SWLS             | -0.52        | 0.56        | -0.94        | .348        | -.11 [-.33, .12]         |
| <i>Neutral as reference</i>   |              |             |              |             |                          |
| <i>Positive vs Neutral</i>    |              |             |              |             |                          |
| (Intercept)                   | 0.20         | 0.29        | 0.68         | .495        | .08 [-.15, .30]          |
| Group(Young)                  | 0.00         | 0.37        | -0.01        | .990        | .00 [-.23, .22]          |
| PSS                           | 0.25         | 0.46        | 0.54         | .591        | .06 [-.16, .29]          |
| PANAS-NEG                     | -0.53        | 0.48        | -1.10        | .271        | -.13 [-.35, .10]         |
| PANAS-POS                     | 0.50         | 0.33        | 1.50         | .134        | .17 [-.05, .39]          |
| SWLS                          | 0.09         | 0.30        | 0.29         | .771        | .03 [-.19, .26]          |
| Group(Young):PSS              | -0.47        | 0.60        | -0.78        | .436        | -.09 [-.31, .14]         |
| Group(Young):PANAS-NEG        | 0.31         | 0.58        | 0.54         | .589        | .06 [-.16, .29]          |
| Group(Young):PANAS-POS        | -0.44        | 0.42        | -1.04        | .300        | -.12 [-.34, .11]         |
| Group(Young):SWLS             | 0.12         | 0.44        | 0.28         | .779        | .03 [-.19, .26]          |

Note: significant ( $p < .05$ ) are bolded for ease of interpretation; SE = standard error of the estimate; p = p-value, r = effect size; PSS: Perceived Stress Scale; PANAS-NEG: Positive and Negative Affect Schedule - Negative Affect; PANAS-POS: Positive and Negative Affect Schedule - Positive Affect; SWLS: Satisfaction With Life Scale.

Table S3. Results of the multilevel multinomial regression for the emotional valence of all statements considering statement as a fixed effect

| Predictor                     | Estimate     | SE          | z-statistic  | p           | R                        |
|-------------------------------|--------------|-------------|--------------|-------------|--------------------------|
| <i>Negative as reference</i>  |              |             |              |             |                          |
| <i>Neutral vs Negative</i>    |              |             |              |             |                          |
| (Intercept)                   | 0.06         | 0.53        | 0.11         | .913        | .01 [-.21, .24]          |
| Group(Young)                  | 0.90         | 0.48        | 1.90         | .058        | .21 [.00, .43]           |
| PSS                           | -0.43        | 0.52        | -0.83        | .404        | -.10 [-.32, .13]         |
| PANAS-NEG                     | 0.40         | 0.56        | 0.71         | .479        | .08 [-.14, .31]          |
| <b>PANAS-POS</b>              | <b>-1.13</b> | <b>0.43</b> | <b>-2.61</b> | <b>.009</b> | <b>-.29 [-.49, -.08]</b> |
| <b>SWLS</b>                   | <b>0.94</b>  | <b>0.36</b> | <b>2.60</b>  | <b>.009</b> | <b>.29 [.08, .49]</b>    |
| st02                          | -0.22        | 0.58        | -0.37        | .710        | -.04 [-.27, .18]         |
| st03                          | 0.28         | 0.61        | 0.47         | .640        | .05 [-.17, .28]          |
| st04                          | 1.07         | 0.60        | 1.79         | .073        | .20 [-.02, .42]          |
| st05                          | 1.19         | 0.62        | 1.93         | .053        | .22 [.00, .43]           |
| st06                          | -0.37        | 0.57        | -0.64        | .525        | -.07 [-.30, .15]         |
| st07                          | 0.17         | 0.60        | 0.28         | .779        | .03 [-.19, .26]          |
| st08                          | 1.26         | 0.69        | 1.82         | .069        | .20 [-.01, .42]          |
| st09                          | 0.35         | 0.62        | 0.55         | .579        | .06 [-.16, .29]          |
| st10                          | 0.19         | 0.61        | 0.30         | .761        | .03 [-.19, .26]          |
| Group(Young):PSS              | 0.12         | 0.82        | 0.14         | .888        | .02 [-.21, .24]          |
| Group(Young):PANAS-NEG        | -0.82        | 0.69        | -1.19        | .235        | -.13 [-.36, .09]         |
| <b>Group(Young):PANAS-POS</b> | <b>1.78</b>  | <b>0.59</b> | <b>3.03</b>  | <b>.002</b> | <b>.33 [.13, .53]</b>    |
| Group(Young):SWLS             | -0.69        | 0.56        | -1.22        | .223        | -.14 [-.36, .08]         |
| <i>Positive vs Negative</i>   |              |             |              |             |                          |
| (Intercept)                   | 0.81         | 0.52        | 1.53         | .125        | .17 [-.05, .39]          |
| Group(Young)                  | 0.87         | 0.51        | 1.69         | .091        | .19 [-.03, .41]          |
| PSS                           | -0.22        | 0.58        | -0.38        | .701        | -.04 [-.27, .18]         |
| PANAS-NEG                     | -0.13        | 0.62        | -0.21        | .834        | -.02 [-.25, .20]         |
| PANAS-POS                     | -0.59        | 0.48        | -1.23        | .219        | -.14 [-.36, .08]         |
| <b>SWLS</b>                   | <b>1.04</b>  | <b>0.40</b> | <b>2.61</b>  | <b>.009</b> | <b>.29 [.08, .49]</b>    |
| st02                          | -0.18        | 0.54        | -0.34        | .736        | -.04 [-.26, .19]         |
| st03                          | 0.34         | 0.57        | 0.60         | .551        | .07 [-.16, .29]          |
| st04                          | -0.25        | 0.60        | -0.42        | .673        | -.05 [-.27, .18]         |
| st05                          | -0.44        | 0.62        | -0.71        | .481        | -.08 [-.31, .14]         |
| st06                          | -0.60        | 0.54        | -1.11        | .267        | -.13 [-.35, .10]         |
| st07                          | -0.49        | 0.58        | -0.84        | .400        | -.10 [-.32, .13]         |
| st08                          | 1.01         | 0.67        | 1.50         | .134        | .17 [-.05, .39]          |
| st09                          | -0.31        | 0.60        | -0.52        | .600        | -.06 [-.29, .17]         |
| st10                          | -0.63        | 0.59        | -1.06        | .289        | -.12 [-.34, .10]         |
| Group(Young):PSS              | -0.40        | 0.88        | -0.46        | .647        | -.05 [-.28, .17]         |
| Group(Young):PANAS-NEG        | -0.52        | 0.76        | -0.68        | .495        | -.08 [-.30, .15]         |
| <b>Group(Young):PANAS-POS</b> | <b>1.29</b>  | <b>0.64</b> | <b>2.03</b>  | <b>.042</b> | <b>.23 [.01, .44]</b>    |
| Group(Young):SWLS             | -0.57        | 0.61        | -0.93        | .352        | -.11 [-.33, .12]         |
| <i>Neutral as reference</i>   |              |             |              |             |                          |
| <i>Positive vs Neutral</i>    |              |             |              |             |                          |
| (Intercept)                   | 0.72         | 0.43        | 1.67         | .095        | .19 [-.03, .41]          |
| Group(Young)                  | -0.02        | 0.41        | -0.06        | .955        | -.01 [-.23, .22]         |
| PSS                           | 0.23         | 0.51        | 0.46         | .649        | .05 [-.17, .28]          |
| PANAS-NEG                     | -0.51        | 0.53        | -0.95        | .340        | -.11 [-.33, .11]         |

|                        |              |             |              |                 |                          |
|------------------------|--------------|-------------|--------------|-----------------|--------------------------|
| PANAS-POS              | 0.52         | 0.37        | 1.39         | .163            | .16 [-.06, .38]          |
| SWLS                   | 0.11         | 0.34        | 0.33         | .744            | .04 [-.19, .26]          |
| st02                   | 0.04         | 0.44        | 0.10         | .924            | .01 [-.22, .24]          |
| st03                   | 0.05         | 0.43        | 0.13         | .900            | .01 [-.21, .24]          |
| <b>st04</b>            | <b>-1.25</b> | <b>0.41</b> | <b>-3.04</b> | <b>.002</b>     | <b>-.33 [-.53, -.13]</b> |
| <b>st05</b>            | <b>-1.54</b> | <b>0.42</b> | <b>-3.71</b> | <b>&lt;.001</b> | <b>-.39 [-.58, -.20]</b> |
| st06                   | -0.22        | 0.44        | -0.50        | .620            | -.06 [-.28, .17]         |
| st07                   | -0.61        | 0.44        | -1.37        | .169            | -.16 [-.38, .07]         |
| st08                   | -0.23        | 0.43        | -0.53        | .594            | -.06 [-.29, .16]         |
| st09                   | -0.61        | 0.44        | -1.37        | .171            | -.16 [-.38, .07]         |
| st10                   | -0.76        | 0.45        | -1.70        | .090            | -.19 [-.41, .03]         |
| Group(Young):PSS       | -0.52        | 0.67        | -0.77        | .439            | -.09 [-.31, .14]         |
| Group(Young):PANAS-NEG | 0.32         | 0.64        | 0.50         | .616            | .06 [-.17, .28]          |
| Group(Young):PANAS-POS | -0.46        | 0.47        | -0.99        | .324            | -.11 [-.34, .11]         |
| Group(Young):SWLS      | 0.10         | 0.48        | 0.20         | .840            | .02 [-.20, .25]          |

Note: significant ( $p < .05$ ) are bolded for ease of interpretation; SE = standard error of the estimate; p = p-value, r = effect size; st# = statement n. #; PSS: Perceived Stress Scale; PANAS-NEG: Positive and Negative Affect Schedule - Negative Affect; PANAS-POS: Positive and Negative Affect Schedule - Positive Affect; SWLS: Satisfaction With Life Scale.

## Personal relevance

Table S4. Results of the linear model for the personal relevance of the first statement

| Predictor              | Estimate    | SE          | t-statistic<br>(df = 65) | p           | r                     |
|------------------------|-------------|-------------|--------------------------|-------------|-----------------------|
| (Intercept)            | 4.16        | 0.25        | 16.98                    | <.001       | .90 [.86, .95]        |
| Group(Young)           | -0.38       | 0.30        | -1.25                    | .215        | -.15 [-.39, .09]      |
| PSS                    | -0.05       | 0.38        | -0.14                    | .892        | -.02 [-.26, .23]      |
| <b>PANAS-NEG</b>       | <b>0.74</b> | <b>0.36</b> | <b>2.07</b>              | <b>.043</b> | <b>.25 [.02, .48]</b> |
| PANAS-POS              | 0.00        | 0.25        | 0.01                     | .990        | .00 [-.24, .25]       |
| <b>SWLS</b>            | <b>0.57</b> | <b>0.22</b> | <b>2.57</b>              | <b>.013</b> | <b>.30 [.08, .53]</b> |
| Group(Young):PSS       | 0.20        | 0.48        | 0.42                     | .679        | .05 [-.19, .30]       |
| Group(Young):PANAS-NEG | -0.34       | 0.42        | -0.81                    | .420        | -.10 [-.34, .14]      |
| Group(Young):PANAS-POS | 0.36        | 0.34        | 1.06                     | .292        | .13 [-.11, .37]       |
| Group(Young):SWLS      | -0.06       | 0.32        | -0.19                    | .853        | -.02 [-.27, .22]      |

Note: significant ( $p < .05$ ) are bolded for ease of interpretation; SE = standard error of the estimate; p = p-value, r = effect size; PSS: Perceived Stress Scale; PANAS-NEG: Positive and Negative Affect Schedule - Negative Affect; PANAS-POS: Positive and Negative Affect Schedule - Positive Affect; SWLS: Satisfaction With Life Scale.

Table S5. Results of the linear mixed model for the personal relevance of all statements considering statement as a random effect

| Predictor              | Estimate | SE   | t-statistic<br>(df = 65) | p     | r                |
|------------------------|----------|------|--------------------------|-------|------------------|
| (Intercept)            | 3.77     | 0.12 | 30.21                    | <.001 | .97 [.96, .99]   |
| Group(Young)           | 0.09     | 0.16 | 0.59                     | .560  | .00 [-.25, .25]  |
| PSS                    | -0.01    | 0.19 | -0.05                    | .959  | -.01 [-.27, .26] |
| PANAS-NEG              | 0.06     | 0.20 | 0.30                     | .762  | .04 [-.23, .31]  |
| PANAS-POS              | 0.16     | 0.14 | 1.14                     | .258  | .15 [-.11, .42]  |
| SWLS                   | 0.13     | 0.12 | 1.03                     | .308  | .14 [-.12, .40]  |
| Group(Young):PSS       | -0.15    | 0.26 | -0.57                    | .572  | -.07 [-.32, .17] |
| Group(Young):PANAS-NEG | 0.08     | 0.24 | 0.34                     | .737  | .04 [-.21, .29]  |
| Group(Young):PANAS-POS | -0.07    | 0.18 | -0.41                    | .687  | -.05 [-.29, .19] |
| Group(Young):SWLS      | -0.20    | 0.18 | -1.11                    | .272  | -.13 [-.36, .10] |

Note: SE = standard error of the estimate; p = p-value, r = effect size; PSS: Perceived Stress Scale; PANAS-NEG: Positive and Negative Affect Schedule - Negative Affect; PANAS-POS: Positive and Negative Affect Schedule - Positive Affect; SWLS: Satisfaction With Life Scale.

Table S6. Results of the linear mixed model for personal relevance of all statements considering statement as a fixed effect

| Predictor              | Estimate | SE   | t-statistic<br>(df = 65) | p     | r                |
|------------------------|----------|------|--------------------------|-------|------------------|
| (Intercept)            | 3.75     | 0.15 | 25.44                    | <.001 | .93 [.90, .95]   |
| Group(Young)           | 0.09     | 0.16 | 0.59                     | .559  | .07 [-.18, .32]  |
| PSS                    | -0.01    | 0.19 | -0.05                    | .957  | -.01 [-.27, .26] |
| PANAS-NEG              | 0.06     | 0.20 | 0.31                     | .761  | .04 [-.23, .31]  |
| PANAS-POS              | 0.16     | 0.14 | 1.14                     | .258  | .15 [-.11, .42]  |
| SWLS                   | 0.13     | 0.12 | 1.03                     | .308  | .14 [-.12, .40]  |
| st02                   | 0.05     | 0.12 | 0.40                     | .692  | .02 [-.06, .10]  |
| st03                   | 0.02     | 0.12 | 0.21                     | .837  | .01 [-.07, .09]  |
| st04                   | 0.17     | 0.12 | 1.45                     | .149  | .06 [-.02, .14]  |
| st05                   | -0.07    | 0.12 | -0.58                    | .562  | -.02 [-.10, .06] |
| st06                   | -0.17    | 0.12 | -1.41                    | .159  | -.06 [-.14, .02] |
| st07                   | 0.05     | 0.12 | 0.39                     | .698  | .02 [-.06, .09]  |
| st08                   | 0.07     | 0.12 | 0.56                     | .578  | .02 [-.06, .10]  |
| st09                   | 0.02     | 0.12 | 0.19                     | .852  | .01 [-.07, .09]  |
| st10                   | 0.02     | 0.12 | 0.20                     | .842  | .01 [-.07, .09]  |
| Group(Young):PSS       | -0.15    | 0.26 | -0.57                    | .571  | -.07 [-.32, .17] |
| Group(Young):PANAS-NEG | 0.08     | 0.24 | 0.34                     | .734  | .04 [-.21, .29]  |
| Group(Young):PANAS-POS | -0.07    | 0.18 | -0.40                    | .691  | -.05 [-.29, .19] |
| Group(Young):SWLS      | -0.20    | 0.18 | -1.10                    | .277  | -.13 [-.36, .10] |

Note: SE = standard error of the estimate; p = p-value, r = effect size; PSS: Perceived Stress Scale; PANAS-NEG: Positive and Negative Affect Schedule - Negative Affect; PANAS-POS: Positive and Negative Affect Schedule - Positive Affect; SWLS: Satisfaction With Life Scale.

## Categories of self-images

Table S7. Results of the multilevel multinomial regression for content category of all statements

| Predictor                                       | Estimate     | SE          | z-statistic  | p           | r                        |
|-------------------------------------------------|--------------|-------------|--------------|-------------|--------------------------|
| <i>Social identities as reference</i>           |              |             |              |             |                          |
| <i>Emotional states vs Social Identities</i>    |              |             |              |             |                          |
| (Intercept)                                     | 1.40         | 0.67        | 2.08         | .037        | .24 [.02, .45]           |
| Group(Young)                                    | -0.16        | 0.98        | -0.16        | .873        | -.02 [-.25, .21]         |
| PSS                                             | -0.33        | 0.90        | -0.37        | .711        | -.04 [-.27, .19]         |
| PANAS-NEG                                       | 1.24         | 1.02        | 1.22         | .223        | .14 [-.08, .37]          |
| PANAS-POS                                       | 1.00         | 0.69        | 1.45         | .147        | .17 [-.06, .39]          |
| SWLS                                            | -0.44        | 0.57        | -0.77        | .439        | -.09 [-.32, .14]         |
| Group(Young):PSS                                | 0.71         | 1.42        | 0.50         | .617        | .06 [-.17, .29]          |
| Group(Young):PANAS-NEG                          | -0.44        | 1.36        | -0.33        | .745        | -.04 [-.27, .19]         |
| Group(Young):PANAS-POS                          | -1.11        | 1.02        | -1.08        | .279        | -.12 [-.35, .10]         |
| Group(Young):SWLS                               | 0.59         | 1.00        | 0.59         | .559        | .07 [-.16, .30]          |
| <i>Specific attributes vs Social Identities</i> |              |             |              |             |                          |
| (Intercept)                                     | -0.14        | 0.99        | -0.14        | .888        | -.02 [-.25, .21]         |
| Group(Young)                                    | 0.52         | 1.31        | 0.40         | .692        | .05 [-.18, .27]          |
| PSS                                             | 0.30         | 1.28        | 0.23         | .816        | .03 [-.20, .26]          |
| PANAS-NEG                                       | -0.04        | 1.48        | -0.03        | .977        | .00 [-.23, .23]          |
| PANAS-POS                                       | 0.00         | 0.98        | 0.00         | .997        | .00 [-.23, .23]          |
| SWLS                                            | 0.33         | 0.80        | 0.41         | .681        | .05 [-.18, .28]          |
| Group(Young):PSS                                | 0.93         | 1.82        | 0.51         | .608        | .06 [-.17, .29]          |
| Group(Young):PANAS-NEG                          | 0.35         | 1.83        | 0.19         | .851        | .02 [-.21, .25]          |
| Group(Young):PANAS-POS                          | 0.59         | 1.31        | 0.45         | .654        | .05 [-.18, .28]          |
| Group(Young):SWLS                               | 0.21         | 1.31        | 0.16         | .873        | .02 [-.21, .25]          |
| <i>Traits vs Social Identities</i>              |              |             |              |             |                          |
| (Intercept)                                     | 2.12         | 0.51        | 4.13         | <.001       | .43 [.25, .62]           |
| Group(Young)                                    | 1.28         | 0.79        | 1.63         | .104        | .19 [-.04, .41]          |
| PSS                                             | -0.73        | 0.62        | -1.18        | .238        | -.14 [-.36, .09]         |
| PANAS-NEG                                       | 1.10         | 0.76        | 1.45         | .147        | .17 [-.06, .39]          |
| PANAS-POS                                       | 0.79         | 0.49        | 1.62         | .105        | .19 [-.04, .41]          |
| SWLS                                            | -0.20        | 0.40        | -0.50        | .616        | -.06 [-.29, .17]         |
| Group(Young):PSS                                | 0.87         | 1.05        | 0.83         | .409        | .10 [-.13, .32]          |
| Group(Young):PANAS-NEG                          | -0.65        | 1.06        | -0.61        | .543        | -.07 [-.30, .16]         |
| Group(Young):PANAS-POS                          | -1.11        | 0.79        | -1.40        | .162        | -.16 [-.38, .06]         |
| Group(Young):SWLS                               | 1.13         | 0.77        | 1.47         | .141        | .17 [-.05, .39]          |
| <i>Specific attributes as reference</i>         |              |             |              |             |                          |
| <i>Emotional states vs Specific attributes</i>  |              |             |              |             |                          |
| (Intercept)                                     | 1.08         | 0.57        | 1.89         | .058        | .00 [.00, .00]           |
| Group(Young)                                    | -0.99        | 0.74        | -1.33        | .184        | -.15 [-.38, .07]         |
| PSS                                             | -0.52        | 0.77        | -0.68        | .499        | -.08 [-.31, .15]         |
| PANAS-NEG                                       | 1.22         | 0.87        | 1.41         | .160        | .16 [-.06, .38]          |
| PANAS-POS                                       | 0.96         | 0.58        | 1.65         | .098        | .19 [-.03, .41]          |
| SWLS                                            | -0.64        | 0.48        | -1.34        | .181        | -.15 [-.38, .07]         |
| Group(Young):PSS                                | -0.32        | 1.12        | -0.28        | .777        | -.03 [-.26, .20]         |
| Group(Young):PANAS-NEG                          | -0.55        | 1.07        | -0.52        | .605        | -.06 [-.29, .17]         |
| <b>Group(Young):PANAS-POS</b>                   | <b>-1.66</b> | <b>0.79</b> | <b>-2.10</b> | <b>.036</b> | <b>-.24 [-.45, -.02]</b> |
| Group(Young):SWLS                               | 0.30         | 0.79        | 0.38         | .707        | .04 [-.19, .27]          |
| <i>Traits vs Specific attributes</i>            |              |             |              |             |                          |

|                               |              |             |              |             |                          |
|-------------------------------|--------------|-------------|--------------|-------------|--------------------------|
| (Intercept)                   | 1.80         | 0.47        | 3.83         | <.001       | .41 [.22, .60]           |
| Group(Young)                  | 0.52         | 0.59        | 0.90         | .370        | .10 [-.12, .33]          |
| PSS                           | -0.93        | 0.60        | -1.56        | .119        | -.18 [-.40, .04]         |
| PANAS-NEG                     | 1.07         | 0.70        | 1.54         | .124        | .18 [-.05, .40]          |
| PANAS-POS                     | 0.77         | 0.45        | 1.70         | .090        | .19 [-.03, .41]          |
| SWLS                          | -0.40        | 0.37        | -1.11        | .269        | -.13 [-.35, .10]         |
| Group(Young):PSS              | -0.19        | 0.79        | -0.24        | .809        | -.03 [-.26, .20]         |
| Group(Young):PANAS-NEG        | -0.76        | 0.83        | -0.91        | .362        | -.11 [-.33, .12]         |
| <b>Group(Young):PANAS-POS</b> | <b>-1.68</b> | <b>0.58</b> | <b>-2.92</b> | <b>.004</b> | <b>-.32 [-.53, -.12]</b> |
| Group(Young):SWLS             | 0.77         | 0.58        | 1.33         | .184        | .15 [-.07, .38]          |

*Emotional states as reference*

*Traits vs Emotional states*

|                        |             |             |             |             |                       |
|------------------------|-------------|-------------|-------------|-------------|-----------------------|
| (Intercept)            | 0.60        | 0.52        | 1.15        | .249        | .13 [-.09, .36]       |
| <b>Group(Young)</b>    | <b>1.31</b> | <b>0.66</b> | <b>1.99</b> | <b>.047</b> | <b>.23 [.01, .44]</b> |
| PSS                    | -0.42       | 0.78        | -0.54       | .587        | -.06 [-.29, .17]      |
| PANAS-NEG              | -0.10       | 0.82        | -0.12       | .906        | -.01 [-.24, .22]      |
| PANAS-POS              | -0.10       | 0.59        | -0.17       | .868        | -.02 [-.25, .21]      |
| SWLS                   | 0.20        | 0.50        | 0.41        | .684        | .05 [-.18, .28]       |
| Group(Young):PSS       | 0.15        | 1.07        | 0.14        | .887        | .02 [-.21, .25]       |
| Group(Young):PANAS-NEG | -0.09       | 0.98        | -0.09       | .925        | -.01 [-.24, .22]      |
| Group(Young):PANAS-POS | -0.13       | 0.75        | -0.18       | .860        | -.02 [-.25, .21]      |
| Group(Young):SWLS      | 0.52        | 0.74        | 0.70        | .486        | .08 [-.15, .31]       |

Note: significant ( $p < .05$ ) are bolded for ease of interpretation; SE = standard error of the estimate; p = p-value, r = effect size; PSS: Perceived Stress Scale; PANAS-NEG: Positive and Negative Affect Schedule - Negative Affect; PANAS-POS: Positive and Negative Affect Schedule - Positive Affect; SWLS: Satisfaction With Life Scale.

Table S8. Results of the multilevel multinomial regression for content category of all statements considering statement as a fixed effect

| Predictor                                    | Estimate    | SE          | z-statistic | p           | r                     |
|----------------------------------------------|-------------|-------------|-------------|-------------|-----------------------|
| <i>Social identities as reference</i>        |             |             |             |             |                       |
| <i>Emotional states vs Social Identities</i> |             |             |             |             |                       |
| (Intercept)                                  | 0.80        | 0.83        | 0.97        | .334        | .11 [-.12, .34]       |
| Group(Young)                                 | 0.03        | 0.99        | 0.03        | .976        | .00 [-.23, .23]       |
| PSS                                          | -0.29       | 0.92        | -0.31       | .757        | -.04 [-.27, .19]      |
| PANAS-NEG                                    | 1.14        | 1.04        | 1.10        | .272        | .13 [-.10, .35]       |
| PANAS-POS                                    | 1.04        | 0.70        | 1.48        | .140        | .17 [-.05, .39]       |
| SWLS                                         | -0.56       | 0.59        | -0.96       | .339        | -.11 [-.34, .12]      |
| st02                                         | 0.24        | 0.75        | 0.32        | .747        | .04 [-.19, .27]       |
| st03                                         | -0.72       | 0.79        | -0.90       | .367        | -.10 [-.33, .12]      |
| st04                                         | 0.54        | 0.78        | 0.69        | .492        | .08 [-.15, .31]       |
| st05                                         | 0.83        | 0.86        | 0.97        | .334        | .11 [-.11, .34]       |
| st06                                         | 0.74        | 0.96        | 0.77        | .442        | .09 [-.14, .32]       |
| <b>st07</b>                                  | <b>2.56</b> | <b>1.24</b> | <b>2.07</b> | <b>.039</b> | <b>.23 [.02, .45]</b> |
| st08                                         | 0.50        | 1.04        | 0.48        | .630        | .06 [-.17, .28]       |
| st09                                         | 1.67        | 1.26        | 1.33        | .184        | .15 [-.07, .38]       |
| st10                                         | 0.20        | 1.40        | 0.14        | .887        | .02 [-.21, .25]       |
| Group(Young):PSS                             | 0.72        | 1.46        | 0.49        | .623        | .06 [-.17, .29]       |

|                                                 |             |             |             |             |                       |
|-------------------------------------------------|-------------|-------------|-------------|-------------|-----------------------|
| Group(Young):PANAS-NEG                          | -0.40       | 1.37        | -0.29       | .770        | -.03 [-.26, .20]      |
| Group(Young):PANAS-POS                          | -1.18       | 1.06        | -1.12       | .263        | -.13 [-.35, .10]      |
| Group(Young):SWLS                               | 0.69        | 1.02        | 0.67        | .501        | .08 [-.15, .31]       |
| <i>Specific attributes vs Social Identities</i> |             |             |             |             |                       |
| (Intercept)                                     | -3.00       | 1.35        | -2.22       | .026        | -.25 [-.47, -.03]     |
| Group(Young)                                    | 0.96        | 1.35        | 0.71        | .477        | .08 [-.15, .31]       |
| PSS                                             | 0.48        | 1.34        | 0.36        | .719        | .04 [-.19, .27]       |
| PANAS-NEG                                       | -0.35       | 1.54        | -0.23       | .818        | -.03 [-.26, .20]      |
| PANAS-POS                                       | 0.03        | 1.02        | 0.03        | .976        | .00 [-.23, .23]       |
| SWLS                                            | 0.20        | 0.83        | 0.24        | .811        | .03 [-.20, .26]       |
| st02                                            | 1.38        | 1.11        | 1.24        | .216        | .14 [-.08, .37]       |
| st03                                            | 1.75        | 1.07        | 1.63        | .103        | .19 [-.04, .41]       |
| <b>st04</b>                                     | <b>2.37</b> | <b>1.11</b> | <b>2.14</b> | <b>.032</b> | <b>.24 [.03, .46]</b> |
| <b>st05</b>                                     | <b>2.84</b> | <b>1.14</b> | <b>2.48</b> | <b>.013</b> | <b>.28 [.07, .49]</b> |
| <b>st06</b>                                     | <b>3.51</b> | <b>1.20</b> | <b>2.94</b> | <b>.003</b> | <b>.32 [.12, .53]</b> |
| <b>st07</b>                                     | <b>4.29</b> | <b>1.45</b> | <b>2.95</b> | <b>.003</b> | <b>.32 [.12, .53]</b> |
| <b>st08</b>                                     | <b>3.71</b> | <b>1.24</b> | <b>3.00</b> | <b>.003</b> | <b>.33 [.12, .53]</b> |
| <b>st09</b>                                     | <b>4.50</b> | <b>1.44</b> | <b>3.13</b> | <b>.002</b> | <b>.34 [.14, .54]</b> |
| <b>st10</b>                                     | <b>3.85</b> | <b>1.49</b> | <b>2.58</b> | <b>.010</b> | <b>.29 [.08, .50]</b> |
| Group(Young):PSS                                | 0.72        | 1.88        | 0.38        | .702        | .04 [-.18, .27]       |
| Group(Young):PANAS-NEG                          | 0.61        | 1.89        | 0.32        | .747        | .04 [-.19, .27]       |
| Group(Young):PANAS-POS                          | 0.49        | 1.36        | 0.36        | .721        | .04 [-.19, .27]       |
| Group(Young):SWLS                               | 0.28        | 1.35        | 0.21        | .833        | .02 [-.20, .25]       |
| <i>Traits vs Social Identities</i>              |             |             |             |             |                       |
| (Intercept)                                     | 1.05        | 0.64        | 1.63        | .104        | .19 [-.04, .41]       |
| <b>Group(Young)</b>                             | <b>1.62</b> | <b>0.78</b> | <b>2.09</b> | <b>.037</b> | <b>.24 [.02, .45]</b> |
| PSS                                             | -0.65       | 0.61        | -1.06       | .289        | -.12 [-.35, .10]      |
| PANAS-NEG                                       | 0.92        | 0.73        | 1.26        | .209        | .14 [-.08, .37]       |
| PANAS-POS                                       | 0.79        | 0.47        | 1.66        | .098        | .19 [-.03, .41]       |
| SWLS                                            | -0.30       | 0.39        | -0.76       | .445        | -.09 [-.32, .14]      |
| st02                                            | 0.40        | 0.64        | 0.62        | .533        | .07 [-.16, .30]       |
| st03                                            | 0.33        | 0.62        | 0.53        | .600        | .06 [-.17, .29]       |
| st04                                            | 0.43        | 0.68        | 0.63        | .531        | .07 [-.16, .30]       |
| st05                                            | 1.05        | 0.74        | 1.43        | .153        | .16 [-.06, .39]       |
| st06                                            | 1.52        | 0.83        | 1.84        | .066        | .21 [-.01, .43]       |
| st07                                            | 2.07        | 1.17        | 1.77        | .077        | .20 [-.02, .42]       |
| st08                                            | 1.67        | 0.90        | 1.86        | .062        | .21 [-.01, .43]       |
| <b>st09</b>                                     | <b>2.38</b> | <b>1.16</b> | <b>2.06</b> | <b>.040</b> | <b>.23 [.02, .45]</b> |
| <b>st10</b>                                     | <b>2.34</b> | <b>1.17</b> | <b>2.01</b> | <b>.045</b> | <b>.23 [.01, .44]</b> |
| Group(Young):PSS                                | 0.81        | 1.05        | 0.77        | .441        | .09 [-.14, .32]       |
| Group(Young):PANAS-NEG                          | -0.53       | 1.04        | -0.51       | .611        | -.06 [-.29, .17]      |
| Group(Young):PANAS-POS                          | -1.15       | 0.80        | -1.45       | .148        | -.17 [-.39, .06]      |
| Group(Young):SWLS                               | 1.24        | 0.76        | 1.63        | .103        | .19 [-.04, .41]       |
| <i>Specific attributes as reference</i>         |             |             |             |             |                       |
| <i>Emotional states vs Specific attributes</i>  |             |             |             |             |                       |
| (Intercept)                                     | 3.12        | 1.02        | 3.05        | .002        | .33 [.13, .54]        |
| Group(Young)                                    | -1.26       | 0.78        | -1.61       | .107        | -.18 [-.41, .04]      |
| PSS                                             | -0.65       | 0.81        | -0.80       | .422        | -.09 [-.32, .13]      |
| PANAS-NEG                                       | 1.46        | 0.92        | 1.58        | .113        | .18 [-.04, .40]       |
| PANAS-POS                                       | 1.00        | 0.61        | 1.63        | .104        | .19 [-.04, .41]       |
| SWLS                                            | -0.66       | 0.50        | -1.31       | .190        | -.15 [-.37, .07]      |



|                                      |              |             |              |             |                          |
|--------------------------------------|--------------|-------------|--------------|-------------|--------------------------|
| st02                                 | -1.01        | 1.02        | -0.99        | .323        | -.11 [-.34, .11]         |
| <b>st03</b>                          | <b>-2.22</b> | <b>1.04</b> | <b>-2.14</b> | <b>.033</b> | <b>-.24 [-.46, -.02]</b> |
| st04                                 | -1.60        | 0.98        | -1.64        | .102        | -.19 [-.41, .03]         |
| st05                                 | -1.75        | 0.99        | -1.76        | .078        | -.20 [-.42, .02]         |
| <b>st06</b>                          | <b>-2.37</b> | <b>1.01</b> | <b>-2.34</b> | <b>.019</b> | <b>-.26 [-.48, -.05]</b> |
| st07                                 | -1.44        | 0.99        | -1.46        | .144        | -.17 [-.39, .06]         |
| <b>st08</b>                          | <b>-2.91</b> | <b>1.03</b> | <b>-2.83</b> | <b>.005</b> | <b>-.31 [-.52, -.11]</b> |
| <b>st09</b>                          | <b>-2.54</b> | <b>1.01</b> | <b>-2.51</b> | <b>.012</b> | <b>-.28 [-.49, -.07]</b> |
| <b>st10</b>                          | <b>-3.40</b> | <b>1.21</b> | <b>-2.81</b> | <b>.005</b> | <b>-.31 [-.52, -.10]</b> |
| Group(Young):PSS                     | -0.13        | 1.17        | -0.11        | .915        | -.01 [-.24, .22]         |
| Group(Young):PANAS-NEG               | -0.77        | 1.13        | -0.69        | .492        | -.08 [-.31, .15]         |
| <b>Group(Young):PANAS-POS</b>        | <b>-1.63</b> | <b>0.82</b> | <b>-1.97</b> | <b>.049</b> | <b>-.22 [-.44, -.01]</b> |
| Group(Young):SWLS                    | 0.28         | 0.82        | 0.35         | .730        | .04 [-.19, .27]          |
| <i>Traits vs Specific attributes</i> |              |             |              |             |                          |
| (Intercept)                          | 3.28         | 0.96        | 3.41         | .001        | .37 [.17, .57]           |
| Group(Young)                         | 0.44         | 0.68        | 0.65         | .516        | .08 [-.15, .30]          |
| PSS                                  | -1.00        | 0.71        | -1.41        | .158        | -.16 [-.39, .06]         |
| PANAS-NEG                            | 1.19         | 0.82        | 1.45         | .148        | .17 [-.06, .39]          |
| PANAS-POS                            | 0.81         | 0.54        | 1.50         | .135        | .17 [-.05, .39]          |
| SWLS                                 | -0.43        | 0.44        | -0.98        | .326        | -.11 [-.34, .11]         |
| st02                                 | -0.82        | 0.95        | -0.87        | .387        | -.10 [-.33, .13]         |
| st03                                 | -1.16        | 0.92        | -1.27        | .205        | -.15 [-.37, .08]         |
| st04                                 | -1.67        | 0.91        | -1.84        | .067        | -.21 [-.43, .01]         |
| st05                                 | -1.47        | 0.91        | -1.62        | .106        | -.18 [-.41, .04]         |
| st06                                 | -1.55        | 0.89        | -1.73        | .084        | -.20 [-.42, .02]         |
| <b>st07</b>                          | <b>-1.84</b> | <b>0.91</b> | <b>-2.02</b> | <b>.044</b> | <b>-.23 [-.45, -.01]</b> |
| st08                                 | -1.66        | 0.89        | -1.87        | .062        | -.21 [-.43, .01]         |
| st09                                 | -1.73        | 0.90        | -1.93        | .054        | -.22 [-.44, .00]         |
| st10                                 | -1.14        | 0.95        | -1.20        | .229        | -.14 [-.36, .09]         |
| Group(Young):PSS                     | -0.08        | 0.94        | -0.09        | .932        | -.01 [-.24, .22]         |
| Group(Young):PANAS-NEG               | -0.84        | 0.97        | -0.86        | .389        | -.10 [-.33, .13]         |
| <b>Group(Young):PANAS-POS</b>        | <b>-1.66</b> | <b>0.68</b> | <b>-2.44</b> | <b>.015</b> | <b>-.27 [-.49, -.06]</b> |
| Group(Young):SWLS                    | 0.79         | 0.68        | 1.17         | .242        | .13 [-.09, .36]          |
| <i>Emotional states as reference</i> |              |             |              |             |                          |
| <i>Traits vs Emotional states</i>    |              |             |              |             |                          |
| (Intercept)                          | 0.08         | 0.49        | 0.16         | .877        | .02 [-.21, .25]          |
| <b>Group(Young)</b>                  | <b>1.48</b>  | <b>0.46</b> | <b>3.20</b>  | <b>.001</b> | <b>.35 [.15, .55]</b>    |
| PSS                                  | -0.42        | 0.52        | -0.79        | .427        | -.09 [-.32, .14]         |
| PANAS-NEG                            | -0.11        | 0.55        | -0.21        | .835        | -.02 [-.25, .20]         |
| PANAS-POS                            | -0.20        | 0.40        | -0.50        | .616        | -.06 [-.29, .17]         |
| SWLS                                 | 0.25         | 0.34        | 0.75         | .453        | .09 [-.14, .31]          |
| st02                                 | 0.16         | 0.52        | 0.31         | .754        | .04 [-.19, .27]          |
| st03                                 | 0.99         | 0.60        | 1.64         | .102        | .19 [-.03, .41]          |
| st04                                 | -0.07        | 0.53        | -0.12        | .901        | -.01 [-.24, .21]         |
| st05                                 | 0.33         | 0.56        | 0.59         | .559        | .07 [-.16, .30]          |
| st06                                 | 0.86         | 0.60        | 1.43         | .153        | .16 [-.06, .39]          |
| st07                                 | -0.26        | 0.57        | -0.46        | .649        | -.05 [-.28, .18]         |
| st08                                 | 1.19         | 0.65        | 1.84         | .066        | .21 [-.01, .43]          |
| st09                                 | 0.79         | 0.62        | 1.28         | .201        | .15 [-.08, .37]          |
| <b>st10</b>                          | <b>2.12</b>  | <b>0.86</b> | <b>2.48</b>  | <b>.013</b> | <b>.28 [.06, .49]</b>    |
| Group(Young):PSS                     | 0.07         | 0.78        | 0.10         | .925        | .01 [-.22, .24]          |

|                        |       |      |       |      |                  |
|------------------------|-------|------|-------|------|------------------|
| Group(Young):PANAS-NEG | -0.10 | 0.69 | -0.15 | .883 | -.02 [-.25, .21] |
| Group(Young):PANAS-POS | -0.11 | 0.56 | -0.19 | .848 | -.02 [-.25, .21] |
| Group(Young):SWLS      | 0.56  | 0.56 | 1.00  | .319 | .12 [-.11, .34]  |

Note: significant ( $p < .05$ ) are bolded for ease of interpretation; SE = standard error of the estimate; p = p-value, r = effect size; st# = statement n. #; PSS: Perceived Stress Scale; PANAS-NEG: Positive and Negative Affect Schedule - Negative Affect; PANAS-POS: Positive and Negative Affect Schedule - Positive Affect; SWLS: Satisfaction With Life Scale.
